# Supplementary material
Source: PubMed Central journal article supplement (PMC3514759)

## Supporting information

### Functional monoclonal antibody acts as a biased agonist by inducing internalization of metabotropic glutamate receptor 7

#### AUTHORS:

C Ullmer<sup>1, \*</sup>, S Zoffmann<sup>2, \*</sup>, B Bohrmann<sup>3</sup>, H Matile<sup>2</sup>, L Lindemann<sup>3</sup>, P J Flor<sup>4</sup>, P Malherbe<sup>3</sup>

F. Hoffmann-La Roche AG, pRED, Pharma Research & Early Development, <sup>1</sup>DTA CV and Metabolism, Discovery Research CV & Metabolic Diseases, <sup>2</sup>Discovery Technologies, <sup>3</sup>DTA Central Nervous System, Discovery Neuroscience, Basel, Grenzacherstrasse 124, CH 4070 Basel, Switzerland, and <sup>4</sup>Faculty of Biology and Preclinical Medicine, Laboratory of Molecular & Cellular Neurobiology, University of Regensburg, Regensburg, Germany

#### CORRESPONDENCE:

Dr. Christoph Ullmer, Tel: +41-61-6888342; E-mail: [christoph.ullmer@roche.com](mailto:christoph.ullmer@roche.com)

#### This SI includes:

Table S1

Fig. S1

Fig. S2

**Table S1. Selectivity of MAB1/28 towards mGlu receptors.** Potencies of MAB1/28 and MAB1/28-derived Fab1 fragments on human mGlu<sub>1</sub>, mGlu<sub>2</sub>, mGlu<sub>5</sub>, and mGlu<sub>8</sub> measured in Ca<sup>2+</sup> mobilization assays configured for the detection of agonism or antagonism of test compounds. The concentration for the antibody and Fab1 fragments refers to the protein concentration, not to the concentration of binding sites. The mean results of several experiments performed in duplicate (reference agonists/antagonists) or as single experiments (MAB1/28/Fab1) ± SDM are reported. (1*S*,2*S*,5*R*,6*S*)-2-aminobicyclo[3.1.0]hexane-2,6-dicarboxylic acid (LY354740): mGlu<sub>2</sub>/mGlu<sub>3</sub> agonist. 7-(hydroxyimino)cyclopropan[b]chromen-1a-carboxylic acid ethyl ester (CPCCOEt): mGlu<sub>1</sub> NAM. 2-methyl-6-(phenylethyl)-pyridine (MPEP): mGlu<sub>5</sub> NAM. (*RS*)- $\alpha$ -methylserine-*o*-phosphate (MSOP): group III mGlu antagonist.

|                                         | mGlu1   |         |    | mGlu2   |        |    | mGlu5   |        |    | mGlu8   |         |    |
|-----------------------------------------|---------|---------|----|---------|--------|----|---------|--------|----|---------|---------|----|
|                                         | mean    | StDev   | N  | mean    | StDev  | N  | mean    | StDev  | N  | mean    | StDev   | N  |
| <b>Agonism (EC<sub>50</sub>, nM)</b>    |         |         |    |         |        |    |         |        |    |         |         |    |
| mAB 1-28                                | >1000   |         | 2  | >1000   |        | 2  | >1000   |        | 2  | 463.73  | 5.26    | 2  |
| Fab (mAB 1-28)                          |         |         |    |         |        |    |         |        |    | 645.75  | 91.41   | 2  |
| L-glutamate                             | 9500.99 | 2727.30 | 12 | 2225.35 | 531.41 | 12 | 1791.26 | 491.18 | 12 |         |         |    |
| quisqualate                             | 492.40  | 123.30  | 4  |         |        |    | 38.58   | 10.74  | 4  |         |         |    |
| LY354740                                |         |         |    | 32.34   | 5.09   | 4  |         |        |    |         |         |    |
| L-AP4                                   |         |         |    |         |        |    |         |        |    | 207.82  | 44.01   | 12 |
| <b>Antagonism (IC<sub>50</sub>, nM)</b> |         |         |    |         |        |    |         |        |    |         |         |    |
| mAB 1-28                                | >1000   |         | 2  | >1000   |        | 2  | >1000   |        | 2  | >1000   |         | 2  |
| Fab (mAB 1-28)                          |         |         |    |         |        |    |         |        |    | >1000   |         | 2  |
| CPCCOEt                                 | 970.34  | 404.58  | 2  |         |        |    |         |        |    |         |         |    |
| LY341495                                |         |         |    | 3.60    | 1.32   | 2  |         |        |    |         |         |    |
| MPEP                                    |         |         |    |         |        |    | 6.45    | 0.97   | 2  |         |         |    |
| MSOP                                    |         |         |    |         |        |    |         |        |    | 6556.97 | 4916.45 | 2  |

**Fig. S1. Selectivity of MAB1/28 towards mGlu receptors.** MAB1/28 displayed no effect as agonist or antagonist in the HEK-293 cell lines stably expressing hmGlu<sub>1a</sub> (A & B), hmGlu<sub>2</sub> (+ Gα16) (C & D), hmGlu<sub>5</sub> (E & F), and hmGlu<sub>8</sub> (+ Gα15) (G & H) using functional Ca<sup>2+</sup> mobilization assay. The activity of reference agonists and antagonists is shown for comparison. At least three independent experiments were performed in duplicate. Error bars represent ± SEM.

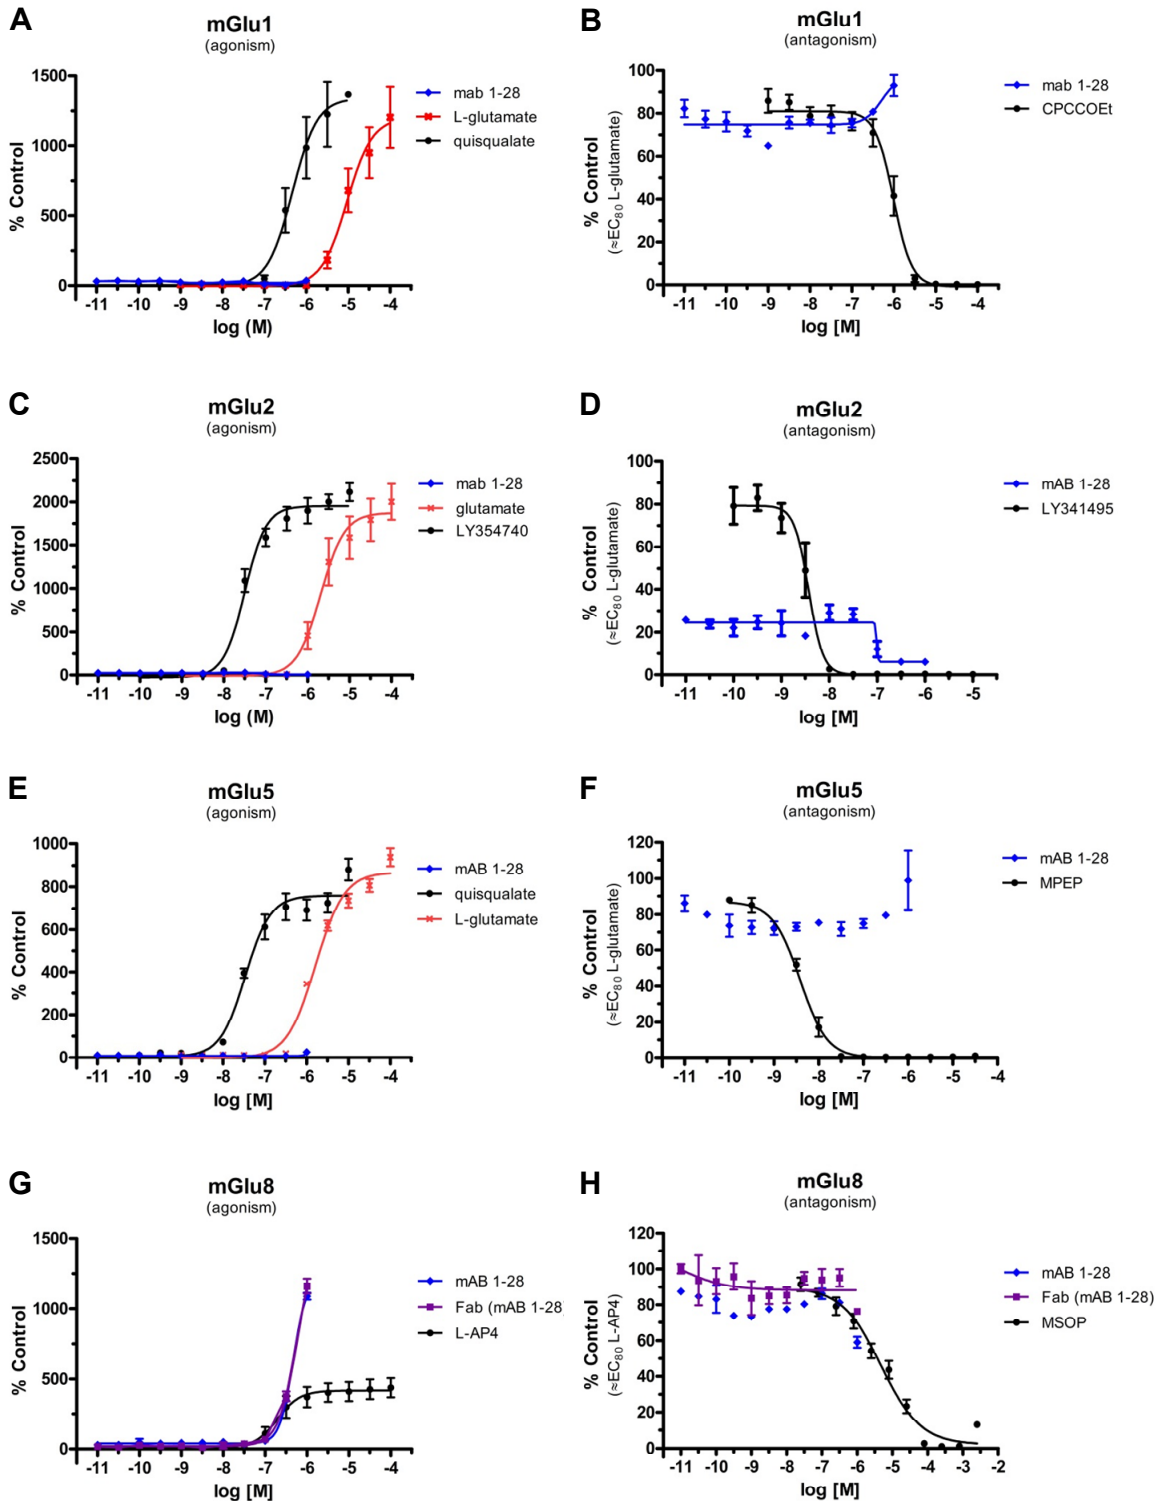

**Fig. S2. Time-lapse sequence of internalising mGlu7 receptors in intact cells.** CHO cells expressing mGlu7 were incubated with directly fluorescein labeled MAB1/28 on ice for 1 h and then returned to conditioned media for 6, 10, 18, 33 and 53 min to allow internalization. Confocal images suggest newly formed spot-like structures to be intracellular and forming in a time-dependent manner.

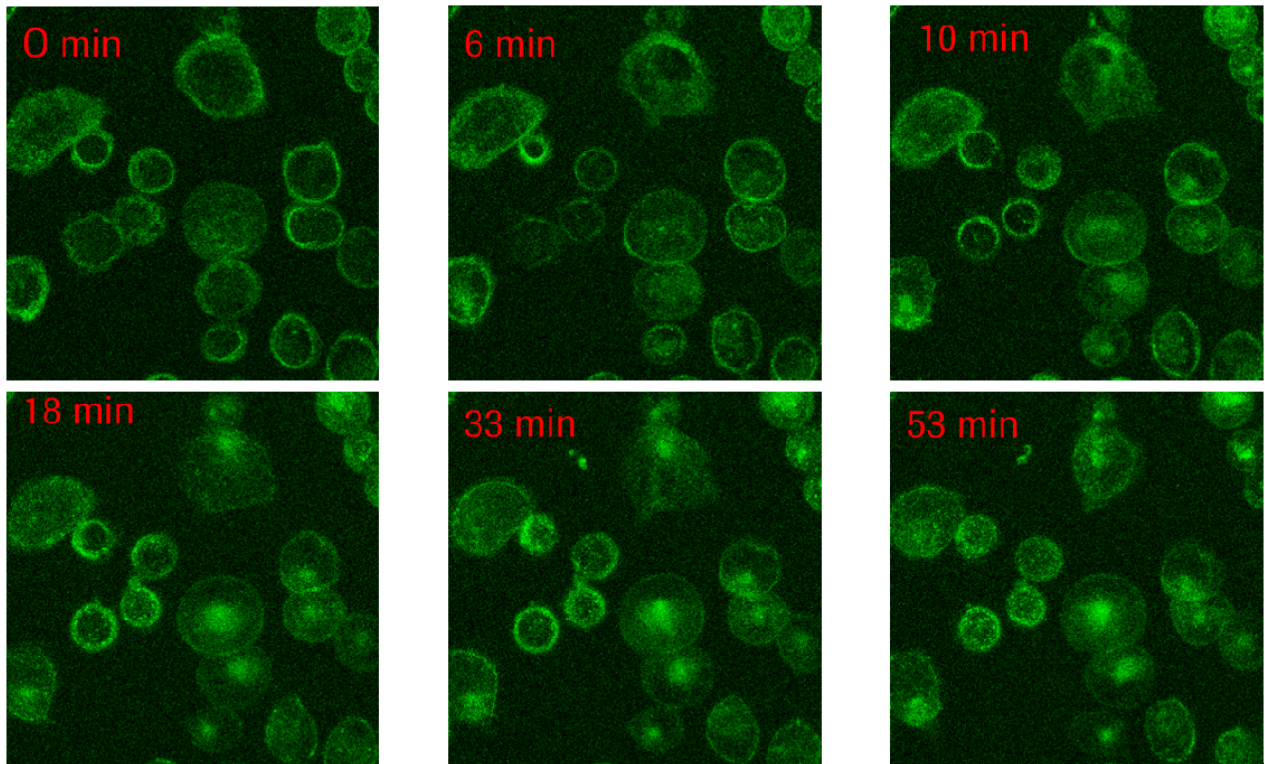

Supplement: bph0167-1448-SD1.pdf [file bph0167-1448-SD1.pdf]
